# Supplementary material for: Doped overoxidized polypyrrole microelectrodes as sensors for the detection of dopamine released from cell populations
Source: Royal Society of Chemistry journal article supplement (doi:10.1039/c3an00085k), 2013-01-01
Supplement: c3an00085k.pdf [file c3an00085k.pdf]

## Electronic Supplementary Information (ESI)

### Doped Overoxidized Polypyrrole Microelectrodes as Sensors for the Detection of Dopamine Released from Cell Populations

*Luigi Sasso,<sup>a</sup> Arto Heiskanen,<sup>a</sup> Francesco Diazzi,<sup>a</sup> Maria Dimaki,<sup>a</sup> Jaime Castillo-León,<sup>a</sup> Marco Vergani,<sup>b</sup> Ettore Landini,<sup>c</sup> Roberto Raiteri,<sup>c</sup> Giorgio Ferrari,<sup>b</sup> Marco Carminati,<sup>b</sup> Marco Sampietro,<sup>b</sup> Winnie E. Svendsen<sup>\*a</sup> and Jenny Emnéus<sup>a</sup>*

<sup>a</sup> Department of Micro- and Nanotechnology, Technical University of Denmark, Ørsted Plads 345E, 2800 Kgs. Lyngby, Denmark. Fax: +45 4588 7762; Tel: +45 4525 5741; E-mail: [winnie.svendsen@nanotech.dtu.dk](mailto:winnie.svendsen@nanotech.dtu.dk)

<sup>b</sup> Department of Electronics and Information Technologies, Politecnico di Milano, Via Golgi 42, 20133 Milano, Italy

<sup>c</sup> Department of Biophysical and Electronic Engineering, University of Genova, Via Opera Pia 11A, 16145 Genova, Italy

\* Corresponding author: Winnie E. Svendsen; Telephone: +45 4525 5741; fax: +45 4588 7762; e-mail address: [winnie.svendsen@nanotech.dtu.dk](mailto:winnie.svendsen@nanotech.dtu.dk)

|                                                             |          |
|-------------------------------------------------------------|----------|
| <b>S-1. Cyclic voltammetric characterization of IDEs</b>    | <b>2</b> |
| <b>S-2. Complete analytical setup</b>                       | <b>3</b> |
| <b>S-3. Comparison of individual dopant counter ions</b>    | <b>4</b> |
| <b>S-4. Chemical Structure of large dopant counter ions</b> | <b>5</b> |

### S-1. Cyclic voltammetric characterization of IDEs

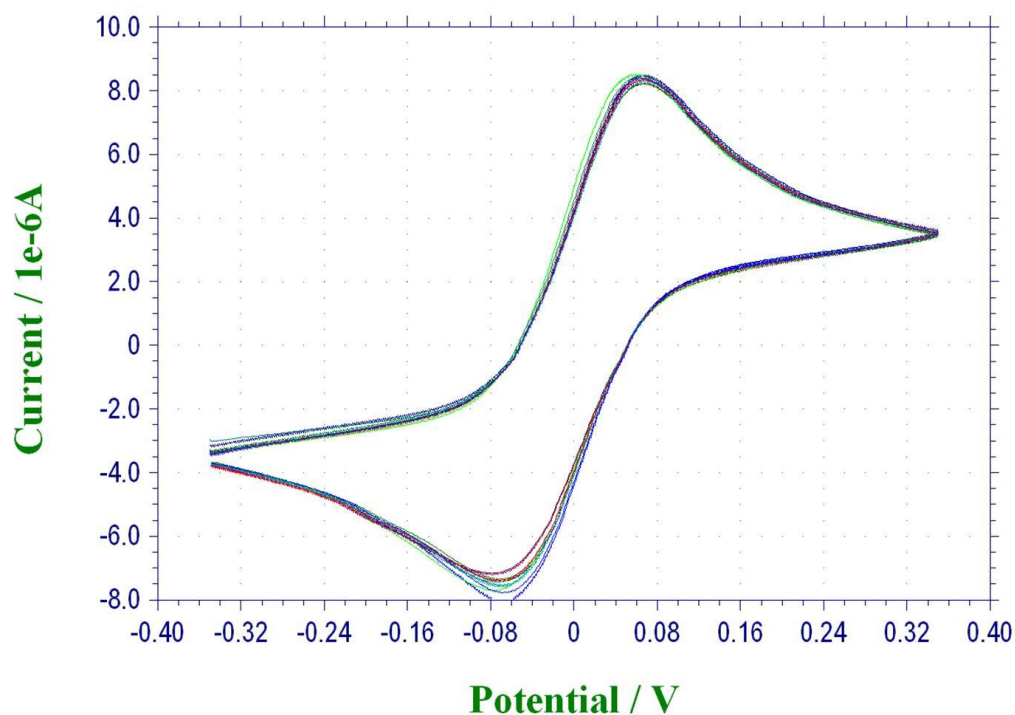

**Figure S-1.** Cyclic voltammograms of 10 mM ferri/ferrocyanide from 12 different individual sets of IDEs after completing the cleaning procedure described in the article. As evident in the figure, no significant potential shift or current peak difference were observed between the different IDEs, reflecting the exceptional quality of the electrodes after cleaning.

## S-2. Complete analytical setup

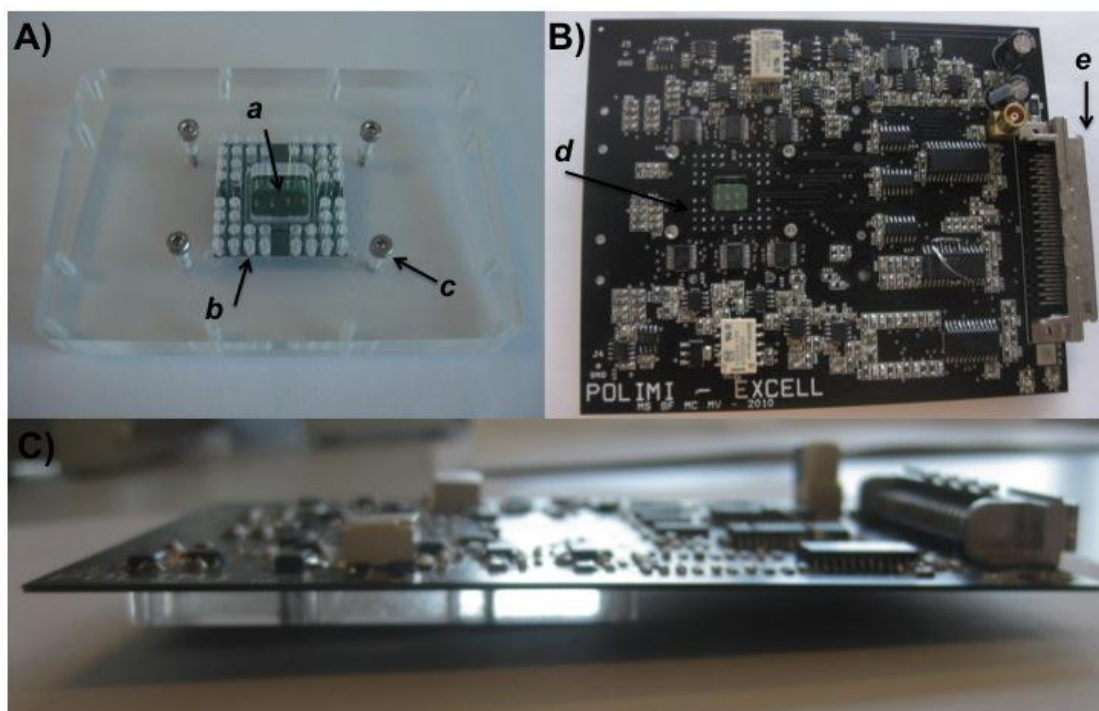

**Figure S-2.** The complete analytical setup showing A) the 2-piece PMMA holder fabricated using micromilling technology with a) the open chamber with exposed IDE sets, b) holes to exposed contact pads for connections via spring-loaded pins and c) screws to ensure good contact between the top and bottom layer of the PMMA holder, to avoid leakage out of the open chamber; B) a top view of the potentiostat incorporated directly onto the PMMA holder with d) locations where the metallic pins extrude from the bottom of the potentiostat PCB to connect directly with the contact pads of the microchip underneath and e) connection to an external computer; C) a side-view of the complete mounted setup.

### S-3. Comparison of individual dopant counter ions

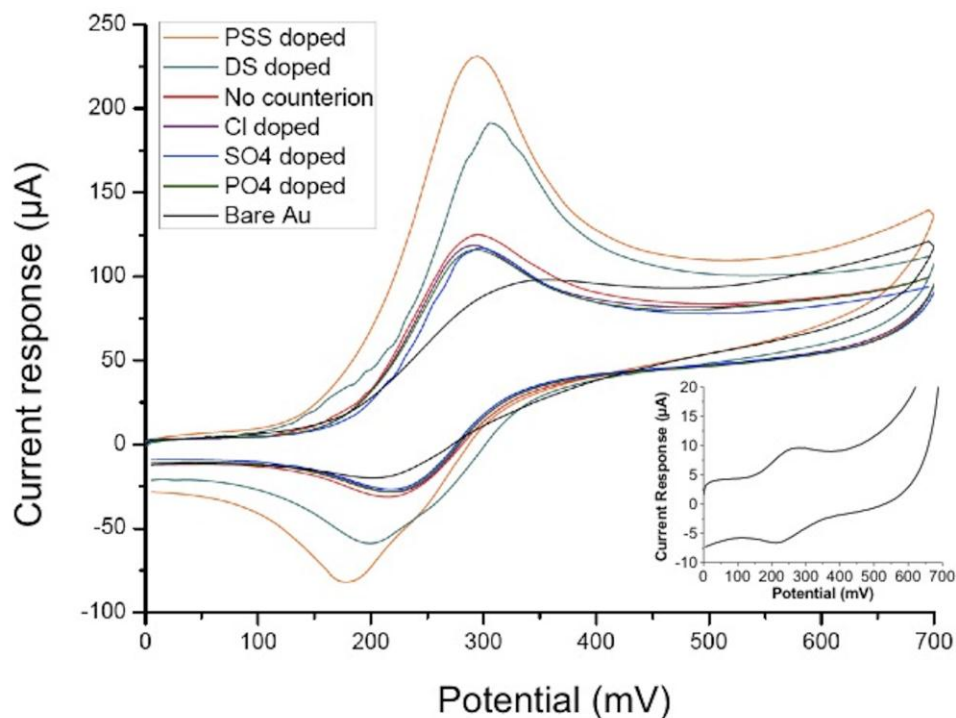

**Figure S-3.** Cyclic voltammograms of 100 μM dopamine (in PBS) on sets of IDEs modified with overoxidized PPy doped with different counter ions. The integrated RE and CE for each IDE set were used to obtain the three-electrode configuration. The potentials were adjusted vs. gold RE and the potential sweep rate was 50 mV/s. Inset shows a voltammogram obtained from the overoxidized PPy/PSS modification as a response to 10 nM.

#### S-4. Chemical Structure of large dopant counter ions

**A)**

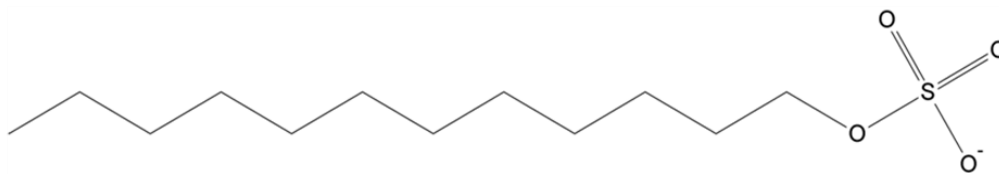

**B)**

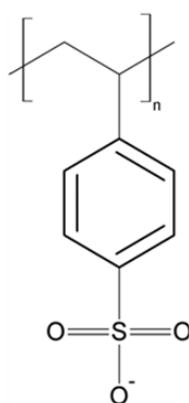

**Figure S-4.** Chemical structure of the large counterions: A) DS<sup>-</sup> and B) PSS<sup>-</sup> (n~340).
